# Supplementary material for: Examining the Genetic Background of Porcine Muscle Growth and Development Based on Transcriptome and miRNAome Data
Source: Preprints.org preprint supplement (doi:10.20944/preprints201803.0257.v1), 2018-03-30
Supplement: Supplementary file 1 [file supplementary]

| Table S2. The 43 DEGs identified in both breeds between groups differing in meat content. | | | | | | | | | |  | | | |
| --- | --- | --- | --- | --- | --- | --- | --- | --- | --- | --- | --- | --- | --- |
| Gene Accession number Gene symbol | | | Hp FC adj pval | | | Pi FC | | adj pval | | |  |  |  |
| ENSSSCG00000017674 | *MED13* | -2.39 | | 5.94E-11 | -1.39 | | 0.002140 | |
| ENSSSCG00000015311 | *CYP51* | -2.27 | | 5.24E-08 | -1.41 | | 0.007487 | |
| ENSSSCG00000006066 | *RNF19A* | -2.10 | | 1.84E-10 | -1.31 | | 0.006446 | |
| ENSSSCG00000007830 | *RBBP6* | -2.06 | | 6.78E-12 | -1.25 | | 0.033282 | |
| ENSSSCG00000028035 | *ZC3H11A* | -2.04 | | 5.09E-12 | -1.24 | | 0.038055 | |
| ENSSSCG00000009061 | *NAA15* | -2.03 | | 3.68E-12 | -1.23 | | 0.025751 | |
| ENSSSCG00000028228 | *protein_coding* | -1.93 | | 4.62E-06 | -1.30 | | 0.014457 | |
| ENSSSCG00000011332 | *SETD2* | -1.87 | | 3.00E-09 | -1.27 | | 0.016705 | |
| ENSSSCG00000003670 | *RLF* | -1.80 | | 3.23E-06 | -1.25 | | 0.045695 | |
| ENSSSCG00000022419 | *FEM1B* | -1.74 | | 2.50E-05 | -1.25 | | 0.031716 | |
| ENSSSCG00000008487 | *ATL2* | -1.72 | | 7.57E-06 | -1.34 | | 0.013031 | |
| ENSSSCG00000004103 | *PCMT1* | -1.46 | | 0.002628 | -1.26 | | 0.039723 | |
| ENSSSCG00000026934 | *PIGX* | -1.27 | | 0.24488 | -1.36 | | 0.021497 | |
| ENSSSCG00000026182 | *protein_coding* | 1.14 | | 0.646066 | 1.54 | | 0.003136 | |
| ENSSSCG00000014565 | *protein_coding* | 1.16 | | 0.582601 | 1.34 | | 0.048292 | |
| ENSSSCG00000029147 | *protein_coding* | 1.29 | | 0.356686 | 1.41 | | 9.87E-07 | |
| ENSSSCG00000017428 | *JUP* | 1.31 | | 0.134578 | 1.39 | | 0.025119 | |
| ENSSSCG00000027946 | *MVP* | 1.32 | | 0.033742 | 1.53 | | 0.002281 | |
| ENSSSCG00000025417 | *BBS2* | 1.37 | | 0.127142 | 1.35 | | 0.022786 | |
| ENSSSCG00000008349 | *CNRIP1* | 1.42 | | 0.020235 | 1.42 | | 0.001871 | |
| ENSSSCG00000022506 | *COL6A1* | 1.46 | | 0.17294 | 1.37 | | 0.032944 | |
| ENSSSCG00000003201 | *ATF5* | 1.51 | | 0.041036 | 1.54 | | 0.003205 | |
| ENSSSCG00000011129 | *ITIH5* | 1.67 | | 0.000236 | 1.38 | | 0.011175 | |
| ENSSSCG00000028022 | *COL6A2* | 1.71 | | 0.05198 | 1.36 | | 0.029189 | |
| ENSSSCG00000026631 | *SLC25A6* | 1.73 | | 2.74E-06 | 1.35 | | 0.028352 | |
| ENSSSCG00000027060 | *TBX2* | 1.73 | | 0.004374 | 1.39 | | 0.026113 | |
| ENSSSCG00000026084 | *MFSD7* | 1.74 | | 0.000551 | 1.41 | | 0.019689 | |
| ENSSSCG00000012953 | *YIF1A* | 1.77 | | 6.74E-08 | 1.33 | | 0.038407 | |
| ENSSSCG00000000033 | *BZRP* | 1.82 | | 0.03506 | 1.45 | | 0.008436 | |
| ENSSSCG00000013901 | *IFI30* | 1.82 | | 0.025505 | 1.37 | | 0.035551 | |
| ENSSSCG00000022246 | *ICOSLG* | 1.83 | | 0.001045 | 1.39 | | 0.017888 | |
| ENSSSCG00000013622 | *TMEM205* | 1.83 | | 2.45E-05 | 1.38 | | 0.022633 | |
| ENSSSCG00000009668 | *CLU* | 1.92 | | 0.000132 | 1.45 | | 0.008532 | |
| ENSSSCG00000008508 | *FAM98A* | 1.95 | | 2.27E-07 | 1.22 | | 0.042541 | |
| ENSSSCG00000000675 | *C1R* | 1.99 | | 3.56E-06 | 1.39 | | 0.004673 | |
| ENSSSCG00000022236 | *protein_coding* | 2.01 | | 0.008151 | 1.53 | | 0.003243 | |
| ENSSSCG00000000606 | *MGP* | 2.04 | | 0.008139 | 1.30 | | 0.029075 | |
| ENSSSCG00000013074 | *RAB3IL1* | 2.16 | | 5.39E-05 | 1.59 | | 0.001274 | |
| ENSSSCG00000027466 | *PCOLCE* | 2.23 | | 0.001512 | 1.27 | | 0.033010 | |
| ENSSSCG00000013181 | *SERPING1* | 2.38 | | 6.82E-07 | 1.27 | | 0.029674 | |
| ENSSSCG00000012841 | *ATGL* | 2.39 | | 6.54E-08 | 1.40 | | 0.013320 | |
| ENSSSCG00000006276 | *CEBPD* | 2.57 | | 3.62E-10 | 1.38 | | 0.023386 | |
| ENSSSCG00000014834 | *UCP3* | 2.73 | | 3.76E-09 | 1.68 | | 0.000316 | |
| Hp – Hampshire; Pi – Pietrain; FC – fold change obtained for DEGs between different phenotypic groups in each breed | | | | | | | | | |
