# Supplementary material for: Examining the Genetic Background of Porcine Muscle Growth and Development Based on Transcriptome and miRNAome Data
Source: Preprints.org preprint supplement (doi:10.20944/preprints201803.0257.v1), 2018-03-30
Supplement: Supplementary file 3 [file Table S1.docx]

| Table S1. The details of differentially expressed genes and miRNAs selected to validation of NGS results. | | | | | | | | | |
| --- | --- | --- | --- | --- | --- | --- | --- | --- | --- |
| **Genes** | | | | | | | | | |
| **Gene symbol** | **Gene name** | | | **Gene accession number** | **Primers** | | | | **Amplicon lenght (bp)** |
| *MGP* | Matrix Gla Protein; Cell Growth-Inhibiting Gene 36 Protein | | | ENSSSCG00000000606 | F AGACCCTGAGAGCAACCTCA  R GGAGGCTTGTTGAGTTCTCG | | | | 224 |
| *BBS2* | Biedl-Bardet- Syndrome 2 | | | ENSSSCG00000025417 | F TGTGGCTCAACCAGAACTTT  R GGAAATCCGCTTCTACCTGA | | | | 225 |
| *PCOLCE* | Procollagen C-Endopeptidase Enhancer | | | ENSSSCG00000027466 | F CCTCTCCACCCACTGACACT  R TGGATAAGAAAGGGGTGCCTA | | | | 261 |
| *COL6A1* | Collagen Type VI Alpha 1 Chain | | | ENSSSCG00000022506 | F GCAACCTGGTGTGGAACG  R CTTTGATGCCCAGGTGCTT | | | | 312 |
| *TBX2* | T-Box 2 | | | ENSSSCG00000027060 | F AGATCGACAACAACCCGTTT  R CAGGGGACTAGGCGCTGT | | | | 209 |
| *XPO1* | Exportin 1 | | | ENSSSCG00000028228 | F TCACAATCAAGTGAATGGTACAGA  R TTCCAGTGAGCTCTTAAAAATCG | | | | 241 |
| **miRNAs** | | | | | | | | | |
| **miRBase ID** | **miRBase ID (Sus Scrofa)** | | **miRBase Accession #** | | | **TaqMan miRNAs Assay ID** | | |  |
| hsa-miR-126-3p | | | ssc-miR-126-3p | | --- | | MIMAT0018378 (pig) | | | | | 477887_mir | | --- | | |  |
| hsa-miR-378a-3p | | ssc-miR-378 | MIMAT0013868 (pig) | | | | | 478349_mir | | --- | | |  |
| hsa-let-7g-5p | | ssc-let-7g | MIMAT0013867 (pig) | | | | 478580_mir | |  |
| hsa-miR-30a-5p | | | ssc-miR-30a-5p | | --- | | MIMAT0010193 (pig) | | | | | 479448_mir | | --- | | |  |
| hsa-miR-451a | | ssc-miR-451 | MIMAT0018382 (pig) | | | | 478107_mir | |  |
| hsa-miR-125b-5p | | ssc-miR-125b | MIMAT0002120 (pig) | | | | 477885_mir | |  |
| hsa-miR-7-5p | | ssc-miR-7 | MIMAT0000252 (human) | | | | | 478341_mir | | --- | | |  |
| hsa-miR-499a-5p | | ssc-miR-499-5p | MIMAT0013877 (pig) | | | | | 478139_mir | | --- | | |  |
| hsa-miR-103a-3p | | ssc-miR-103 | MIMAT0002154 (pig) | | | | | 478253_mir |  |
| hsa-miR-20a-5p | | ssc-miR-20a | MIMAT0000075 (human) | | | | | 478586_mir |  |
